# Supplementary material for: Simulation of a lithosphere-atmosphere-ionosphere electromagnetic coupling prior to the Wenchuan M S 8.0 earthquake
Source: Copernicus journal article supplement (doi:10.5194/nhess-2024-94), 2024-06-14
Supplement: Supplementary file [file nhess-2024-94-RC2-supplement.pdf]

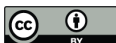

1     **Simulation of a lithosphere-atmosphere-ionosphere electromagnetic**  
2                     **coupling prior to the Wenchuan  $M_S8.0$  earthquake**

3                     Mei Li<sup>1,\*</sup>, Zhuangkai Wang<sup>2</sup>, Chen Zhou<sup>2</sup>, Handong Tan<sup>3</sup>, Meng Cao<sup>4</sup>

4  
5                     <sup>1</sup>Institute of Earthquake Forecasting, China Earthquake Administration, Beijing 100036, China

6                     <sup>2</sup>Department of Space Physics, School of Electronic Information, Wuhan University, Wuhan 430072, China

7                     <sup>3</sup>China University of Geosciences, Beijing 100083, China

8                     <sup>4</sup>Sichuan Hydropower Engineering Geophysical Exploration Co., Ltd, Chengdu 610072, China

9

10                    *Correspondence to:* M. Li (mei\_seis@163.com)

11

12     **Abstract** Continuously to a previous work on qualitatively investigating the probable electromagnetic  
13     interacting process among lithosphere, atmosphere and ionosphere, this **work** aims to quantitatively  
14     establish an electromagnetic coupling model among these three spheres prior to the **Wenchuan**  
15     **earthquake**. Firstly, a **underground finite length electrical dipole** in a half-space model has been  
16     employed to estimate the possible “energy source” for an observable  $1.3 \text{ mV m}^{-1}$  electrical field  
17     registered at **1440 km** Gaobeidian station during the Wenchuan event. The result shows that the  
18     seismo-telluric current **covers  $\sim 10^5\text{--}10^6$  kA** if the measuring frequency  $f = 0.01\text{--}10$  Hz **considered**. The  
19     **central magnitude of the vertical electrical field caused by the current at 0.01 Hz on the Earth’s surface**  
20     **can be up to  $\text{kV m}^{-1}$** . Then, this vertical field **acts as an input into an electric field penetration model**. It  
21     is shown that this field attenuates quickly at the atmosphere and completely vanishes at the top  
22     ionosphere and produces a  $0.1 \text{ mV m}^{-1}$  additional electrical field at the ionospheric bottom. Through  
23     the TIE-GCM, this additional electrical field causes 0.01% ionospheric variations on electron density  
24     and TEC near the Wenchuan epicenter, as well as near its magnetically conjugated point. Further, the  
25     simulations have also been **discussively** performed on frequencies of 1 Hz and 10 Hz. **The results**  
26     **demonstrate that the variations of electron density present their maximum values at the height of  $\sim 300\text{--}$**   
27     **400 km and the varied percentages of ionospheric parameters have been beyond 10%, the same**  
28     **magnitude as what has been registered during the Wenchuan shock.**

29

30

31

32

33

34

35

36

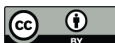

## 37 1. Introduction

38 So far, short-term earthquake prediction is still one of the most challenging targets worldwide,  
39 but the investigations on probable earthquake precursors in the fundamental geophysical framework  
40 should be better than trying to guess the future (Eftaxias et al., 2003; Prescott, 2019; Hough, 2020;  
41 Conti et al., 2021). An earthquake (EQ) is a systematical geodynamic process that develops gradually  
42 as a strain accumulates slowly for several years, and culminates with a sudden rupture and  
43 displacement of a fault in the rigid lithosphere (Bock, 1994). Exploring and understanding for possible  
44 earthquake precursors, especially short-term ones, has been the most promising approach to short-term  
45 earthquake prediction. Electromagnetic observing on possible information originated from seismic  
46 activities is one of the most effective geophysical ways to snoop the last process of earthquake  
47 evolutionary. But there is still a controversial understanding on the issue of mechanism on producing  
48 and propagating of seismic signals from ground-based electromagnetic observation although pronounce  
49 achievements have been gained on this problem. As Earth observation from satellite develops, more  
50 and more reports have shown that the ionosphere, as a conductive part of the air, is unexpectedly  
51 sensitive to seismic activities. Ionospheric measuring has gradually shown its potential application in  
52 the field of earthquake monitoring and forecasting and emergency rescue due to its fast-speed, large-  
53 scale, and high-resolution results, especially for areas with poor natural environments. In very recent  
54 years, it has been testified that there is an energy transfer among lithosphere, atmosphere and  
55 ionosphere at the last stages of earthquake preparation. Thus, a promising way to improve the  
56 understanding on this complex geodynamic process is to integrate ground data with satellite Earth  
57 Observation combined (De Santis et al., 2015).

58 Investigations on seismo-ionospheric influence or lithosphere-atmosphere-ionosphere coupling  
59 (LAIC) mechanism have been primarily performed on the basis of two hypotheses: internal gravity  
60 wave (IGW) or electric field.

61 Gokhberg et al. (2000) have found that the irregular ionospheric variations occurred several days  
62 prior to strong earthquakes after an analysis of experimental data obtained at the last stage of  
63 earthquake preparation. These ionospheric irregularities are attributed to the propagation of IGW  
64 through the ionosphere and originated from the long wave earth oscillations, local green gas effect or  
65 an unsteady injection of lithosphere. Thus, they have supposed that the generation of IGW (acoustic  
66 gravity wave, AGW, after) should be considered as a mechanism of LAI coupling (Molchanov et al.,  
67 2004; Meister et al., 2011). However, Sorokin & Hayakawa (2013, 2014) have presented that it is  
68 difficult to interpret observing results of earthquake precursory information on the basis of IGW  
69 propagation model due to its insufficient theoretical simulations and wave-like propagating features  
70 (Conti et al., 2021). Therefore, it is easily to understand that investigations on LAI coupling transmit  
71 from an acoustic-driven mechanism to an electromagnetic coupling due to its very low effectiveness  
72 (Pulinets & Davidenko, 2014).

73 However, the electromagnetic “energy source” of the LAI coupling originated beneath the Earth  
74 or in the atmosphere has still been under controversial. There are generally two different viewpoints:  
75 electric sources beneath the Earth or ones on the ground. On one hand, scientists, who think that this  
76 electromagnetic source is beneath the ground, have to confront with a problem, that is the producing  
77 and propagating mechanism of electromagnetic emissions underground. Many laboratory and  
78 wild-field rock fracturing experiments have broadly been conducted to understanding the producing  
79 mechanism of electric and magnetic signals. Qian et al., (1996, 2003) have found that the large  
80 magnetic pulses with shorter periods appeared at the last stage of the experiment. These relative high

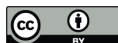

81 frequency signals may be induced by instantaneous electric current of the accumulated charges during  
82 the main cracking acceleration (Hao et al., 2003). While Freund et al. (Freund & Wengeler, 1982) have  
83 proposed that seismo-telluric current may **attribute** to transmission of negative charge carriers and  
84 positive holes from stressed rocks (Freund, 2002, 2009, 2010; Freund & Sornette, 2007; Scoville et al.,  
85 2015). Up to now, several mechanisms, like electrokinetic and magnetohydrodynamic, piezomagnetism,  
86 and microfracturing, have been proposed to explain the producing and propagating processes of electric  
87 and magnetic emissions observed both during seismic activity and in the laboratory experiments but no  
88 specified one has been well established (Conti et al., 2021; Heavlin et al., 2022). To construct  
89 underground physical or **mathematics** models is always being **an effective way to investigate this topic**  
90 (Huang, 2011; Huang & Lin, 2010; Ren et al., 2012).

91 On the other hand, **investigators, who believe that the “electric energy” of the LAI coupling on the**  
92 **ground, think that seismic activities can trigger off radon ionization, charged particulates injection and**  
93 **changes in load resistance in global electric circuit, which further leads to zonal additional electrical**  
94 **field near the ground** (Pulinets & Ouzounov, 2010; Pulinets & Davidenko, 2014). While Sorokin &  
95 Hayakawa (2013, 2014) have thought that injection of charged aerosols into the atmosphere acts as  
96 electro-motive force to cause changes of conduction current in global electric circuit, which **facilitates**  
97 the electrical field propagating vertically to the ionosphere. However, Pulinets & Davidenko (2014)  
98 have reported that no scientific publications have **demonstrated** such injection of charged aerosols into  
99 atmosphere before earthquakes, and the vertical external current flowing into the Global Electric  
100 Circuit is absolutely impossible. Pulinets & Ouzounov (2010) have **demonstrated** that air ionization and  
101 hydration processes induced by earthquakes in the vicinity of active tectonic faults change the global  
102 electric circuit, which leads to a zonal additional electrical field near the Earth’s surface (Pulinets &  
103 Davidenko, 2014). Kuo et al (2011, 2014) have investigated the LAI coupling on the basis of this  
104 p-hole theory to consider stressed seismic fault as a dynamo to drive currents from stressed rocks to the  
105 Earth’s surface. Zhou et al. (2017) have further developed an electrodynamic LAI coupling model  
106 based on the DC electric field penetration and the results show that the LAIC electric field can  
107 penetrate into a higher altitude in the ionosphere at a low latitude than at a high latitude. This  
108 conclusion indicates that the additional electric field must be large enough during the LAI coupling if  
109 expected observable plasma irregularity is obtained in the ionosphere. At the same time, an upper  
110 atmosphere numerical model has been utilized to investigate the LAI coupling and the results have  
111 displayed that seismogenerated zonal electric field can cause vertical plasma drift of F2 layer leading to  
112 the disturbance of TEC (total electron content) (Namgaladze et al., 2012; Zolotov et al., 2012; Zolotov,  
113 2015).

114 Additionally, thermal anomalies, such as ground surface latent flux and ongoing longwave  
115 radiation (OLR), have also been considered as possible mechanism to drive LAI coupling but lacking  
116 of a well-established model (Hayakawa & Pulinets, 2009, Pulinets et al., 2000; Liperovsky et al., 2008;  
117 Freund, 2011). However, whatever the physical mechanism of the electromagnetic field generation is,  
118 it seems that the electric sources or “energy sources” near the ground is undoubtedly a necessary part  
119 during LAI coupling. Achieving a better understanding of a complex physics coupling of earthquakes  
120 by the efforts of the involved scientific community worldwide will be dedicated to find a final answer  
121 (De Santis et al., 2015; Conti et al. 2021).

122 **At 14:28:01 CST (China Standard Time) on May 12, 2008, a large EQ with a magnitude of  $M_s$  8.0**  
123 **hit the Wenchuan area, Sichuan province, with an epicenter located at 103.4 °E and 31.0 °N and a depth**  
124 **of 19 km.** This event caused major extensive damage and 69,000 people lost their lives.



125 As a personal experience of tracing and recording measurement in Hebei observing network  
126 during this large event (See the Supplement), Li et al. (2009) have firstly in Chinese and then in  
127 English (Li et al., 2013) reported remarkable visible ULF ( $f = 0.01\text{--}10$  Hz or its advantageous  
128 frequency band  $f = 0.1\text{--}10$  Hz) electromagnetic emissions of  $1.3\text{ mV m}^{-1}$  electrical field recorded at the  
129 1440 km Gaobeidian observing station during the Wenchuan EQ. Utilizing an ‘Earth-ionosphere’  
130 physical model and a half-space model, Li et al. (2016) have modulated and interpreted the probability  
131 of this abnormal phenomenon recorded at a far distance and inferred a possible seismo-elluric currents  
132 at the depth of the Wenchuan hypocenter with and without ionospheric effect considered.

133 **In this paper, on the basis of the work done by Li et al. (2016), this investigation mainly focuses**  
134 on the propagating process of the ground observable electrical field among the atmosphere and the  
135 ionosphere, and the corresponding ionospheric influence caused by this field. So, in Section 2, in the  
136 light of the observable electrical field registered during the Wenchuan EQ, we first utilize a half-space  
137 model constructed by Li et al. (2016) to infer a probable underground seismo-elluric current, which  
138 will act as the “energy source” driving the total LAI electromagnetic coupling. In Section 3, an electric  
139 field penetration model developed by Zhou et al. (2017) will be employed to investigate the  
140 propagating process of the electrical field induced by this current in the atmosphere and the ionosphere.  
141 Additional electrical field at the bottom of the ionosphere will also calculated during this time. In  
142 Section 4, ionospheric variations caused by this additional field will be evaluated using TIE-GCM  
143 (Thermosphere-Ionosphere-Electrodynamics General Circulation Model) and compared with the  
144 real-time ionospheric recordings during the Wenchuan event. Discussion and conclusions are in  
145 Section 5 and Section 6, respectively.

146

## 147 **2. An estimation of the LAIC “energy source” associated with the Wenchuan EQ**

148 Li et al. (2009) have firstly presented that obvious ULF ( $f = 0.01\text{--}10$  Hz) electromagnetic  
149 emissions were recorded at 1440 km Gaobeidian station in Hebei observing network prior to the  
150 Wenchuan  $M_s 8.0$  EQ and the peak of the electrical signals reached  $1.3\text{ mV m}^{-1}$  during the climax stage  
151 of this anomaly. Then, Li et al. (2013) have established the relative locations of the Wenchuan epicenter  
152 and the Hebei observing networks in Figure 1 to describe the electromagnetic anomaly recorded at the  
153 remote observing stations. Further, Li et al. (2016) had employed two physical models of a half-space  
154 model and an “Earth-ionosphere” model to gain the probability of this unprecedented anomaly  
155 registered by such a remote station if the ionospheric influence considered. Their results have shown  
156 that the ionosphere can promote the electromagnetic wave propagation, which is equivalent to an  
157 effective improvement of the detectability of the system. The system could easily recorded signals  
158 originated from the epicentral area of seismic activities even beyond its detectable range. At that time, a  
159 surface coordinate system had been added to Figure 1 in Li et al. (2013) to form Figure 5 in Li et al.  
160 (2016) to comply with the models and this figure has been also employed in this paper named Figure  
161 1a.

162 Here, we use Figure 1a in this paper to exhibit the relative locations of the observing stations in  
163 Hebei ULF electromagnetic observation network and the Wenchuan epicenter, as well as a surface  
164 coordinate system. A half-space model utilized in Li et al. (2016) has also been employed here as  
165 Figure 1b: An x-directed dipole with a length  $L$  and a current  $I$  is located in the bottom medium (Earth:  
166  $z > 0$ ). Here the Earth is considered homogeneous, with the electrical properties: magnetic  
167 permeability  $\mu_1$ , permittivity  $\epsilon_1$ , and conductivity  $\sigma_1$ . The top medium (air:  $z < 0$ ) is with electrical  
168 properties  $\mu_0$ ,  $\epsilon_0 (= 8.854 \times 10^{-12}$  Farad  $\text{m}^{-1}$ ) and  $\sigma_0 (= 10^{-14}$  S  $\text{m}^{-1}$ ).

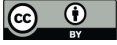

169 The approach to investigate the electromagnetic fields emitted by a long dipole current source  
 170 follows the magnetic vector potential formulation developed by Key (2009), who developed a  
 171 generalized formulation for multiple layers below and above the transmitter. Exponential forms had  
 172 been adopted for the recursions in isotropic media, with the  $z$  axis downward. Assuming a  
 173 time-harmonic source with  $e^{-i\omega t}$  time dependence, Maxwell's equations are

$$174 \quad \nabla \times \mathbf{E} = i\omega\mathbf{B}, \quad (1)$$

175 and

$$176 \quad \nabla \times \mathbf{B} = \mu\sigma\mathbf{E} + \mu\mathbf{J}_s. \quad (2)$$

177 where, magnetic permeability  $\mu$  variations are negligible and angular frequency  $\omega$  is low enough so  
 178 that the displacement currents can be neglected. Expression  $\mathbf{J}_s = \mathbf{I}\delta(\mathbf{r} - \mathbf{r}_0)$  is the imposed electric  
 179 dipole source at position  $\mathbf{r}_0$  with vector moment  $\mathbf{I}$ , and here is limited to an infinitesimal dipole with  
 180 unit moment.

181

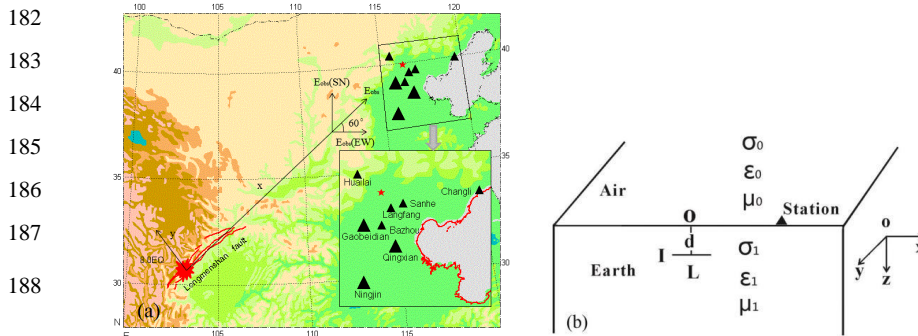

189

190 **Figure 1.** (a) Relative locations of the Wenchuan EQ epicenter and observation stations. Black solid triangles  
 191 show observing stations in Hebei observing network and bigger ones indicate the stations recording abnormal  
 192 information. The red star denotes Beijing (Li et al., 2013, Figure 1). A ground surface coordinate system has been  
 193 formed by Li et al. (2016). (b) The half-space model: an  $x$ -directed dipole current source is placed in the bottom  
 194 medium (Earth), and the dipole center coordinate is  $(0, 0, d)$ . Here,  $z$  is defined positive in the downward direction.

195

196 The total space is assumed to be non-magnetic and the magnetic permeability  $\mu$  variations are  
 197 negligible in the different layers, i.e.  $\mu_1 = \mu_0 = 4\pi \times 10^{-7}$  Farad  $\text{m}^{-1}$ . On the same manner we  
 198 have  $\epsilon_1 = \epsilon_0 = 8.854 \times 10^{-12}$  Farad  $\text{m}^{-1}$ , i.e.  $\epsilon_1$  is not considered as zero during all calculations.  
 199 The rupture length is set  $L = 150$  km, within 30 s out of the total 90 s of the main Wenchuan rupture  
 200 (Zhang et al., 2009) and the conductivity of the Earth is  $\sigma_1 = 1.0 \times 10^{-3}$   $\text{S m}^{-1}$  (Li et al., 2016)  
 201 during the calculations. For an observed  $1.3 \text{ mV m}^{-1}$  electrical field at the Gaobeidian station, the  
 202 expected seismo-elluric current falls in the range of  $I = 1.5 \times 10^5 - 3.4 \times 10^6$  kA for the frequency range of  
 203  $f = 0.01 - 10$  Hz. It can be seen that the current gradually increases as the observing frequency increases  
 204 due to a dramatic attenuation of the electrical fields at higher frequency. This current induces  
 205 electromagnetic emissions at the Earth's surface. Figure 2 displays two-dimensional distributions of  
 206 three electrical components of  $E_x$ ,  $E_y$  and  $E_z$ , respectively, produced at the Earth's surface by the  
 207 seismo-elluric current  $I = 1.5 \times 10^5$  kA when  $f = 0.01$  Hz.

208

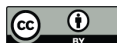

209

210

211

212

213

214

215

216

217

218

219

220

221

222

223

224

225

226 **Figure 2.** Two-dimensional distributions of electrical field components of (a)  $E_x$ , (b)  $E_y$ , and (c)  $E_z$ , respectively  
227 induced by the Wenchuan seismo-current  $I = 1.5 \times 10^5$  kA at  $f = 0.01$  Hz after making a logarithm calculation at the  
228 Earth's surface.

229

230 Figure 2 presents the 2-D power radiation patterns of three electrical components  $E_x$ ,  $E_y$ , and  $E_z$ ,  
231 respectively at the Earth's surface induced by the Wenchuan dipole source  $I = 1.5 \times 10^5$  kA at  $f = 0.01$   
232 Hz within 1000 km from the epicenter. From Figure 2, we can see that the magnitude of the electrical  
233 field intensity **near the Wenchuan epicenter** can be up to  $\text{kV m}^{-1}$  for each component, for instance,  $10^2$   
234  $\text{kV m}^{-1}$  for  $f = 1$  Hz and  $10^4$   $\text{kV m}^{-1}$  for  $f = 10$  Hz. From this point, we also can infer that the maximum  
235 electrical field at the ground for all frequency band of  $f = 0.01$ – $10$  Hz during the Wenchuan event can  
236 beyond  $\text{kV m}^{-1}$  order. The maximum **value central** is  $3.25$   $\text{kV m}^{-1}$  for the vertical field  $E_z$  at  $f = 0.01$  Hz  
237 near the center when the calculated electrical values have been examined, which will be as an input  
238 into an electric field penetration model developed by Zhou et al. (2017) in the following part.

239

### 240 **3. Electrical coupling between the ground surface electromagnetic emissions and** 241 **ionosphere**

#### 242 **3.1. Basic equations and boundary conditions**

243 The electric field penetration model developed by Zhou et al. (2017) has been briefly reviewed  
244 first.

245 In the atmosphere, when the duration of a seismic event is equaling to or more than the  
246 atmospheric electric field relaxation time  $\tau_0$ , the atmospheric condition can be transmitted from an  
247 arbitrary initial state to a final steady state, which complies with the Ohm's law and the charge  
248 conservation condition. Now, the electrostatic potential equation has been attained:

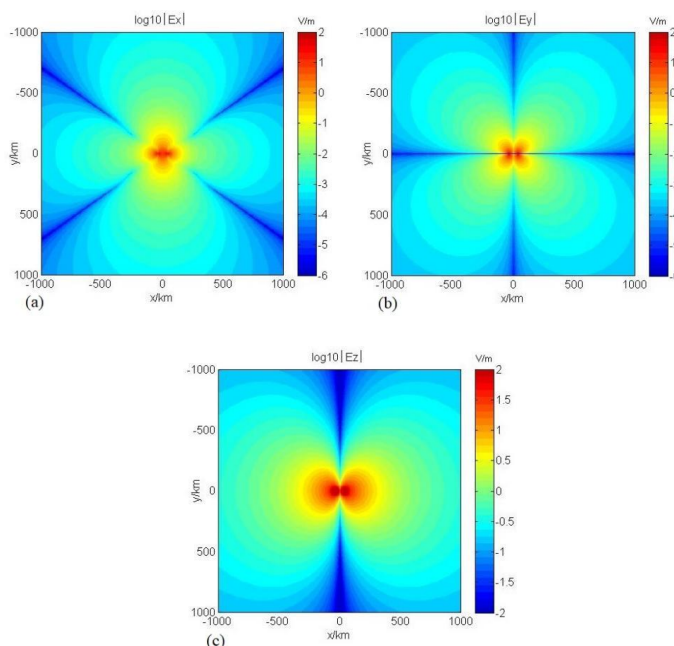

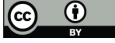

$$-\nabla \cdot (\bar{\sigma} \cdot \nabla \Phi) = Q \quad (1)$$

where  $\bar{\sigma}$  is the conductivity tensor.

In a Cartesian coordinate system, where,  $z$ -axis is vertically upward,  $x$ -axis is toward magnetic south, and  $y$ -axis is toward magnetic east,

Equation (Eq.) (1) can be written as

$$\left( S^2 + \frac{\sigma_{\parallel}}{\sigma_P} C^2 \right) \frac{\partial^2 \Phi}{\partial x^2} + \frac{\partial^2 \Phi}{\partial y^2} + \left( C^2 + \frac{\sigma_{\parallel}}{\sigma_P} S^2 \right) \frac{\partial^2 \Phi}{\partial z^2} - 2 \left( 1 - \frac{\sigma_{\parallel}}{\sigma_P} \right) CS \frac{\partial^2 \Phi}{\partial x \partial z} - \frac{CS}{\sigma_P} \left( \frac{\partial \sigma_P}{\partial z} - \frac{\partial \sigma_{\parallel}}{\partial z} \right) \frac{\partial \Phi}{\partial x} - \frac{C}{\sigma_P} \frac{\partial \sigma_H}{\partial z} \frac{\partial \Phi}{\partial y} + \frac{\partial(\sigma_P C^2 + \sigma_{\parallel} S^2)}{\sigma_P \partial z} \frac{\partial \Phi}{\partial z} = Q(x, y, z) \quad (2)$$

where  $\sigma_{\parallel}$ ,  $\sigma_P$  and  $\sigma_H$  are the parallel, Pedersen and Hall conductivity, respectively. Magnetic field lines are in the  $x$ - $z$  plane.  $I$  is the dip angle,  $S = \sin I$ , and  $C = \cos I$ .  $Q(x, y, z)$  is the current source. In this LAIC model, we consider that the potential source is  $j_z = \sigma_0 E_{z=0}$ , and here  $E_{z=0}$  is the vertical component of the electrical field induced at the Earth's surface by the Wenchuan **seismo-elluric** current  $I$  attained above and  $Q(x, y, z) = 0$ , which are treated as the lower boundary condition during the following calculations. However, a direct current is expected when this LAI coupling model developed by Zhou et al. (2017). Taking this limit under consideration, we have to assume that the ULF electromagnetic emissions appeared **during** the Wenchuan event meet the like-steady condition at the lower frequency band here. At the same time, Li et al. (2019) have qualitatively investigated the real time recordings from ground-based electromagnetic observation, geomagnetic observation and ionospheric observation occurred three days prior to the Wenchuan event. And the results show that their evolutionary processes in time reached the climax simultaneously within dozens of hours on 9 May, which indicates the LAI coupling occurred.

For the upper boundary condition,  $z_{\infty}$  has been set as the upper boundary of the ionosphere and no current flows out of this boundary. As we all know, variations of conductivity cover a large scale from the Earth's surface to ionosphere. Thus, the conductivity profile has been divided into three parts:

I neutral atmospheric **regionwithz < 50 km**, here the conductivity is considered to be isotropic,  $\sigma_{\parallel}(0) = \sigma_P(0) = 1.0 \times 10^{-14} \text{ S m}^{-1}$  and  $\sigma_{\parallel}(z) = \sigma_P(z) = \sigma(0) \exp\left(\frac{z}{6\text{km}}\right)$ .

II atmosphere-ionosphere transition area with  $50 \text{ km} < z < 90 \text{ km}$ , **wconsidering** the continuity of the conductivity profile, we adopt the following formula:  $\sigma_{\parallel}(z) = \sigma_1 \exp\left(\frac{z-50}{h_{\parallel}}\right)$ , and  $\sigma_P(z) = \sigma_1 \exp\left(\frac{z-50}{h_P}\right)$ .

III ionosphere with  $z > 90 \text{ km}$ , where the conductivity mainly depends on charged particles, cyclotron frequency of electron and ion, and their collision frequency,  $\sigma_{\parallel} = \sum_a \frac{e^2 n_a}{m_a v_a}$ ,  $\sigma_P = \frac{1}{B} \sum_a \frac{v_a \Omega_a}{v_a^2 + \Omega_a^2} e n_a$ , and  $\sigma_H = \frac{1}{B} \sum_a \frac{\Omega_a^2}{v_a^2 + \Omega_a^2} e n_a$ , where  $a$  stands for the  $a$  species charged particles and  $n_a$ ,  $v_a$  and  $\Omega_a$  are the number density, collision frequency and cyclotron frequency of the particles. More details can be found in Zhou et al. (2017).

For high-latitude region, where the magnetic lines are vertical, the dip angle  $I = 90^\circ$ ,  $S = 1$  and  $C = 0$ . Eq. (2) can be simply written as:

$$\sigma_{\parallel} \frac{\partial^2 \Phi}{\partial z^2} + \sigma_P \frac{\partial^2 \Phi}{\partial x^2} + \sigma_P \frac{\partial^2 \Phi}{\partial y^2} + \frac{\partial \sigma_{\parallel}}{\partial z} \frac{\partial \Phi}{\partial z} = 0 \quad (3)$$

With the lower-boundary and the upper-boundary conditions considered, the current distribution in the atmosphere will be attained by solving the electric potential Eq. (3), as well as in the ionosphere with the constrain of the conductivity defined above.



293 The simulation results gotten by Zhou et al. (2017) at high latitude have shown that the vertical  
 294 current produced by the additional surface vertical electrical filed flows into the ionosphere without  
 295 losing in the neutral atmosphere and then this current could induce abnormal ionospheric electrical  
 296 field. This process at high latitude can also be suitable for low-mid latitude due to an exponential  
 297 decrease of atmospheric conductivity, which is not dependent on a background magnetic line.

298 The current from the atmosphere has been considered as the source term and the electrical  
 299 penetration model in the ionosphere can be solved referred to the propagation of thundercloud electric  
 300 fields into the ionosphere. Under these conditions when the magnetic line is not vertical and the Earth's  
 301 magnetic field is treated as a simple dipole field, Eq. (3) can be transformed into the form of the dipole  
 302 coordinate system:

$$303 \quad \frac{\partial}{\partial t} \left( a \frac{\partial \Phi}{\partial t} \right) + \frac{\partial}{\partial \varphi} \left( b \frac{\partial \Phi}{\partial \varphi} \right) + \frac{\partial c}{\partial \varphi} \frac{\partial \Phi}{\partial t} - \frac{\partial c}{\partial t} \frac{\partial \Phi}{\partial \varphi} = - \frac{\partial}{\partial s} (h_\varphi h_t j_s) \quad (4)$$

$$304 \quad \text{where, } a = -\sigma_p \frac{h_\varphi h_s}{h_t}, \quad b = -\sigma_p \frac{h_t h_s}{h_\varphi}, \quad c = -\sigma_h h_s.$$

305 Considering the conjugated effect (the potentials of ionospheric south and north ends of a  
 306 magnetic line equals each other due to a high ionospheric conductivity), Eq. (4) can be integrated along  
 307 the magnetic field lines connecting the lower boundaries of the opposite hemispheres:

$$308 \quad A \frac{\partial^2 \Phi}{\partial z^2} + B \frac{\partial^2 \Phi}{\partial \varphi^2} + D \frac{\partial \Phi}{\partial t} + E \frac{\partial \Phi}{\partial \varphi} = F \quad (5)$$

309 where  $A, B, C, D, E$  and  $F$  are parameters concerned with  $a, b, c, h_\varphi, h_t, h_s$  in equation (4),  $S_1$  and  
 310  $S_2$  are the lower and upper boundaries of the northern hemisphere,  $S_3$  and  $S_4$  of the southern  
 311 hemisphere, respectively. The range of the conductive ionosphere has been set to 90–500 km. More  
 312 details can be seen in Zhou et al. (2017).

313 Eq. (5) is the ionospheric potential equation. Unlike Eq. (3), Eq. (5) is a two-dimensional  
 314 equation but with a nonhomogeneous term as the electrical field source propagating along  $s$  direction:  
 315  $j_{s1}$  and  $j_{s2}$  in lower and upper northern ionospheric boundaries. When the region taken part in  
 316 calculation is far away from the pole and the magnetic equator, the solution area is  $(t_{\min} \times t_{\max}) \times$   
 317  $(\varphi_{\min} \times \varphi_{\max})$ , where  $t_{\max} = t_0 + 0.1$  and  $t_{\min} = t_0 - 0.1$  are the magnetic field lines close to and  
 318 far away from respectively the magnetic equator, and  $\varphi_{\min} = \varphi_0 - \frac{10}{360}\pi$  and  $\varphi_{\max} = \varphi_0 + \frac{10}{360}\pi$   
 319 are the left and right boundaries of the magnetic longitude. If this boundary is far away from the  
 320 areawhere the current flows, Dirichlet conditions are well met and the boundary potential can be  
 321 considered to 0:

$$322 \quad \Phi(t_{\min, \max}, \varphi) = 0 \quad \text{and} \quad \Phi(t, \varphi_{\min, \max}) = 0 \quad (6)$$

323 Under these boundary conditions, the potential of the ionosphere in Eq. (5) is a 2D elliptic partial  
 324 differential equation and can be solved using a relaxation iterative method. Combined with Eq. (4) and  
 325 the solution of Eq. (5), the distribution of electric field in the ionosphere will be attained.

### 327 3.2. Propagation of additional current in atmosphere and ionosphere

328 The current density on the ground can be attained  $j_z = \sigma_0 E_{z=0}$  when the conductivity  
 329  $\sigma_0 = 10^{-14} \text{ S m}^{-1}$ , where  $E_{z=0}$  is the calculated vertical electrical field by the Wenchuan source  $I =$   
 330  $1.5 \times 10^8 \text{ A}$  at  $f = 0.01 \text{ Hz}$  at the Earth surface and its radiation pattern could be refer to Figure 2c in  
 331 Section 2. Thus, we can attain that the maximum value of the current density near the Wenchuan  
 332 source at the Earth's surface  $j_{\max(z=0)}$  is of  $10^{-11} \text{ A m}^{-2}$ . This current propagates upward continuously  
 333 among the atmosphere and the ionosphere. Equations established and related boundary conditions in  
 334 Section 3.1 have been utilized to simulate this process.





335 Figure 3 presents two-dimensional distributions of calculated electrical fields of (a) north  
336 component  $E_x$ , (b) east component  $E_y$ , and (c) vertical component  $E_z$ , respectively in the magnetic x-y  
337 plane at the ionospheric bottom with an altitude  $z = 90$  km. It is apparently shown that the induced  
338 electrical field with  $\text{kV m}^{-1}$  at the ground surface (See Figure 2) has been subjected to a severe  
339 attenuation in the atmosphere to  $0.1\text{mV m}^{-1}$  magnitude at the ionospheric bottom. Zhou et al. (2017)  
340 have demonstrated that, compared with high latitude region, in the mid-low latitudinal regions, the  
341 intensity of the total horizontal electric field increases with the latitude and the vertical electric field is  
342 more evident at low latitudes

343 On one hand, this current propagates continuously with a rapid attenuation in the well-conductive  
344 ionosphere. Figure 4 exhibits the vertical electrical field distribution of this current flow in x-z plane  
345 with an increasing altitude under the constraint of conductivity defined above. As presented in Figure 4,  
346 the vertical current splits from its source and transmits in the ionosphere continuously with a rapid  
347 attenuation, especially for the height beyond 150 km and eventually vanishes at the top of the  
348 ionosphere with  $z = 500$  km. The penetration height of additional electric field in the ionosphere is  
349 higher at high latitudes than that at low latitudes (Zhou et al., 2017). On the other hand, the additional  
350 electrical current from the atmosphere modifies the ionospheric parameters either by heating the  
351 ionosphere or by the plasma drifting in the electrical field of this current (Ruzhin et al., 2014). Thus,  
352 the additional potential determined by this current will be considered as an input in the following part.

353  
354

355

356

357

358

359

360

361

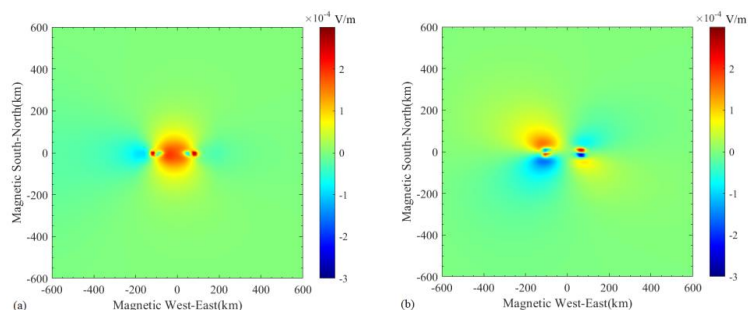

362

363

364

365

366

367

368

369

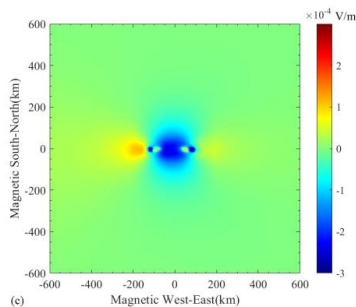

370

371

372

373

374

**Figure 3.** Two-dimensional distributions of the calculated electric field components at the ionospheric bottom (altitude 90 km) when the surface vertical current source of Figure 2c as an input into the atmosphere-ionosphere coupling model. This current source is the induction at the Earth surface from the Wenchuan finite length dipole at the operating frequency  $f = 0.01$  Hz. (a) Horizontal north field  $E_x$ ; (b) Horizontal east field  $E_y$ ; (c) Vertical field  $E_z$ .



375  
376  
377  
378  
379  
380  
381  
382  
383  
384  
385  
386

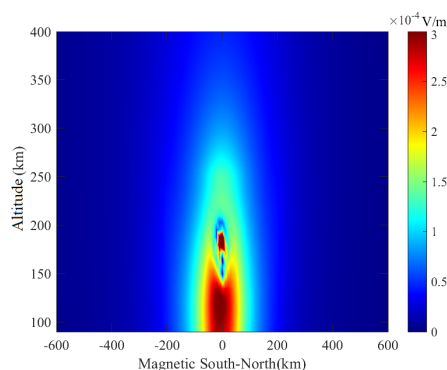

387  
388  
389

**Figure 4.** Distribution of the additional vertical electrical field caused by the Wenchuan source at the frequency  $f = 0.01$  Hz at x-z plane in the ionosphere.

390

#### 4. Ionospheric variations caused by the additional potential

391  
392  
393  
394  
395  
396  
397  
398  
399  
400  
401  
402  
403

Here, the **TIE-GCM** (Thermosphere-Ionosphere-Electrodynamics General Circulation Model) has been employed to attain ionospheric modifications caused by the Wenchuan source at the frequency  $f = 0.01$  Hz. The TIE-GCM is a self-consistent physical model developed by National Center for Atmospheric Research (NCAR) and it is a comprehensive thermosphere and ionosphere coupling system to solve the three-dimensional momentum, energy and continuity equations for neutral and ion species using finite difference method. With polar particle deposition, high latitude electrical field and tidal effect from lower atmosphere considered, the TIE-GCM can **calculates** global distributions of the neutral gas temperature and winds, the height of the constant pressure surface and the number densities of the major constituents within the altitude 90–700 km when several parameters, such as F10.7 daily index, Kp index, etc. act as input (Roble et al., 1988; Richmond et al., 1992; Rougier et al., 2007). The additional potential induced by the Wenchuan source at the bottom of the ionosphere also as an input into this dynamic model after some modifications on its original codes.

404  
405  
406  
407  
408  
409  
410  
411  
412  
413  
414  
415  
416  
417  
418

Figure 5 demonstrates ionospheric influence with percentages of the additional potential on the electron density (Ne) at an altitude ~400 km (Figure 5a) and the total electron content (TEC) (Figure 5b). **From Figure 5, it is clear that the additional potential from the Wenchuan source can causes ionospheric variations on both parameters in the Wenchuan epicentral area, as well as in its magnetically conjugated area, which is highly coincident with what have been described by most authors (Zhao et al., 2010; Liu et al., 2009; Pulinets et al., 2009; Yan et al., 2012; and references therein) in light of real-time ionosphere measurement. But the variation in this time is with a little magnitude of ~0.01%. Many documents have presented positive and negative variations on these both parameters at the opposite hemispheres prior to the Wenchuan EQ (Zhao et al., 2008; Yu et al., 2009; Liu et al., 2015; Akhoondzadeh et al., 2010; Pulinets & Ouzounov, 2011; and references therein).** He et al. (2011) have reported a 30% increase of electron density during the Wenchuan event. Zeng et al. (2009) have presented more than 20% variations on electron density, electron temperature and  $O^+$  density. It also has been reported 20%–60% negative and positive fluctuations on TEC prior to this event (Yan et al., 2012; Yu et al., 2009). Comparatively, the simulation results in this time are less far from real-time recordings by different sensors.



419  
420  
421  
422  
423  
424  
425  
426  
427  
428  
429  
430

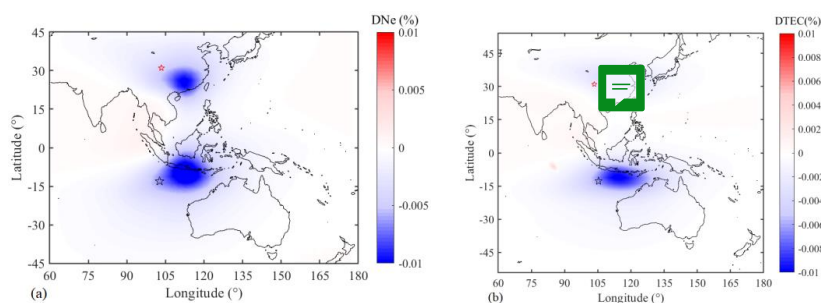

431 **Figure 5.** Ionospheric influence of the Wenchuan source at  $f = 0.01$  Hz on (a) electron density Ne and (b) the total  
432 electron content TEC. The Wenchuan epicenter and its magnetically conjugated point have been labeled by a red  
433 star and a black star, respectively in each panel.  
434

## 435 5. Discussion

436 The fact that abundant electromagnetic emissions on ULF–ELF electrical field (Li et al., 2009,  
437 2013; Gao et al., 2010; An et al., 2013; Jin et al., 2020), as well as ULF geomagnetic anomaly (Hu et  
438 al., 2009; Wang et al., 2009; Hayakawa et al., 2015; Li et al., 2015; Cheng et al., 2010; Li et al., 2019),  
439 before the 12 May 2008 Wenchuan  $M_s 8.0$  earthquake have been gradually reported. At the same time,  
440 ionospheric variations registered by different equipment of ground-based ionosonde data (Zhao et al.,  
441 2008; Sun et al., 2011; Maurya et al., 2013; and references therein), DEMETER satellite data (Zhang  
442 et al., 2009; Onishi et al., 2011; Liu et al., 2015; Walker et al., 2013; and references therein),  
443 ground-based GPS satellite data (Zhao et al., 2010; Liu et al., 2009; Pulinets et al., 2009; Zhu et al.,  
444 2009; and references therein), radio occultation data from six microsattellites of  
445 FORMOSAT3/COSMIC (F3/C) data (Liu et al., 2009; Ma et al., 2014; Hsiao et al., 2010), and  
446 CHAMP (challenging minisatellite payload) satellite data (Ryu et al., 2014) have also been confirmed  
447 as an increasing number of literatures published. These anomalies present different time scales and  
448 varied magnitudes but take on a common climax on May 9, 2008, three days prior to the Wenchuan  
449 main event, which undoubtedly raises an upsurge on theoretical or speculative interpreting them and  
450 investigating a probable LAI coupling concerned with all aspects on its mechanism.

451 Li et al. (2019) have qualitatively analyzed temporal variation orders of ground-based ultra-low  
452 frequency (ULF) electrical field, geomagnetic field and ionospheric parameters occurred on May 9  
453 2008. They results indicate an LAIE coupling process: the electromagnetic energy propagates from the  
454 epicentral area to the Earth’s surface, via the atmosphere and ionosphere, finally to its magnetically  
455 conjugated area in the opposite hemisphere, causing ground-based, atmospheric and ionospheric  
456 electromagnetic disturbances, in that order. In this research, theoretical simulations on this LAI  
457 electromagnetic coupling process have been performed on the basis of an observable  $1.3 \text{ mV m}^{-1}$  ULF  
458 ( $f = 0.01\text{--}10$  Hz) electrical field registered at 1440 km Gaobeidian observing station in Hebei Province.  
459 An infinite length electrical dipole in half-space model has been utilized beneath the Earth to estimate  
460 the “energy source” of this LAI coupling and the calculated seismo-telluric current  $I$  lies in the range of  
461  $1.5 \times 10^5\text{--}3.4 \times 10^6$  kA corresponding to the frequency range of  $f = 0.01\text{--}10$  Hz. Bortnik et al. (2010) have  
462 employed an electrical dipole collocated with the 31 October 2007 “Alum Rock”  $M_w = 5.6$  earthquake



463 hypocenter to interpret an observable 30 nT pulse at 1 Hz and  $D = 2$  km and their results present an  
464 estimated seismo-telluric current  $\sim 10$ – $100$  kA. Comparatively, the result attained in this time is  
465 probably in a reasonable range (Li et al., 2016).

466 In the atmosphere, an electrical field penetration model developed by Zhou et al. (2017) has  
467 been used to simulate the propagating properties of the surface current from the Wenchuan source.  
468 Corresponding to the direct current in this model, the vertical electrical field  $E_z$  produced by the  
469 seismo-telluric current  $I = 1.5 \times 10^5$  kA at  $f = 0.01$  Hz has acted as the primary input into this model.  
470 The central magnitude of this input electrical field on the ground surface can be up to  $\text{kV m}^{-1}$  and this  
471 field attenuates to the order of  $0.1 \text{ mV m}^{-1}$  at the bottom ( $z = 90$  km) of the ionosphere, which merely  
472 leads to  $\sim 0.01\%$  variations on electron density at the altitude 400 km and TEC in the ionosphere, an  
473 incomparable value with real-time measured. Concerned with the electrical penetration model, Zhou et  
474 al. (2017) have proposed that  $1000 \text{ V m}^{-1}$  vertical electrical field on the ground can generate  $1.1 \times 10^{-6} \text{ V}$   
475  $\text{m}^{-1}$  electrical field at the ionospheric bottom at the magnetic latitude of  $30^\circ \text{N}$ , which is too smaller than  
476 background ionosphere electrical field of  $1$ – $3 \text{ mV m}^{-1}$  to generate ionospheric fluctuations by  
477 electrodynamic processes. Therefore, a dramatic increase in atmospheric conductivity by neutral  
478 atmosphere ionizing is suggested by Zhou et al. (2017).

479 Kuo et al. (2014) have presented a 20% ionospheric variation induced by  $5 \text{ mV m}^{-1}$  electrical  
480 field corresponding to  $100 \text{ nA m}^{-2}$  current density at the ground surface. To get an obvious ionospheric  
481 variations, by an LAI coupling model, Kim & Hegai (1999) and Pulinet et al. (2000) proposed that  
482 obvious vertical electric fields at the Earth's surface could transmit into the ionosphere via the  
483 atmosphere and modify dynamic and electronic properties of the ionosphere prior to the earthquake  
484 Their results have presented that a  $\sim 1 \text{ kV m}^{-1}$  vertical electric field at the Earth's surface can be  
485 expected to produce a  $\sim 1 \text{ mV m}^{-1}$  horizontal electric field at the ionospheric heights to give rise to  
486 obvious ionospheric variations.

487 Sorokin & Hayakawa (2013, 2014) have presented that the injection of charged aerosols into  
488 the atmosphere acts as an additional EMF (electro-motive force) in the global circuit. Under this  
489 condition, the total electric current can be written as  $\mathbf{j} = \sigma \mathbf{E} + \mathbf{j}_e$ , here  $\mathbf{j}_e$  is EMF external current and  $\sigma \mathbf{E}$   
490 is conductive current. The additional electrical field can be up to  $10 \text{ mV m}^{-1}$  leading to ionospheric  
491 variations when the EMF external current acts as a compensate term during the conductive current  
492 propagating up to the ionosphere. On the basis of model, Yang et al. (2014) have performed a  
493 numerical simulation on seismic-related DC electric field during atmosphere-ionosphere coupling.  
494 Their results have presented that the horizontal scale of electric field in the ionosphere is larger than  
495 that of the external current in the atmosphere and this current can induce much larger electric field at  
496 night than during the day.

497 As a discussion, we have also performed all corresponding calculations on other observing  
498 frequencies at  $f = 1$  Hz and  $f = 10$  Hz, respectively, like done on  $f = 0.01$  Hz. The calculated  
499 magnitudes of ground-surface vertical electrical fields near the central points for these two frequencies  
500 can be up to  $10^2 \text{ kV m}^{-1}$  and  $10^4 \text{ kV m}^{-1}$ , corresponding to respective ionospheric-bottom electrical  
501 fields of  $\sim 200 \text{ mV m}^{-1}$  and  $\sim 1000 \text{ mV m}^{-1}$ . Figure 6 shows differences of electron density (DNe) for  
502 different layers defined in TIE-GCM model of 10 ( $\sim 100$  km in altitude), 30 ( $\sim 200$  km), 35 ( $\sim 250$  km),  
503 40 ( $\sim 300$  km), 50 ( $\sim 400$  km) and 55 ( $\sim 450$  km) due to an input electrical potential determined by the  
504 Wenchuan source at the frequency  $f = 1$  Hz. As shown in Figure 6, the patterns and the magnitudes of  
505 the DNe during this period are variable in different altitudes near the epicenter and its magnetically  
506 conjugated area. It is shown clearly that the magnitude of positive variations increases as the altitude

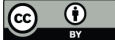

507 increases below ~300 km and can reach 5% at 200–300 km, while the maximum varied magnitude can  
508 be up to 10% but with negative anomaly at ~400 km, which is highly coincident with the work done by  
509 He & Heki (2016, 2018). They have investigated the variations of the total electron content (TEC)  
510 before two mid-latitude EQs of the 2010 Maule  $M_w$ 8.8 EQ and the 2015 Illapel  $M_w$ 8.3 EQ in Chile and  
511 the results have demonstrated that the ionospheric anomalies have displayed both positive and negative  
512 regions, with different altitudes of ~200 km and ~400 km, respectively, distributing roughly along the  
513 geomagnetic fields.

514

515

516

517

518

519

520

521

522

523

524

525

526

527

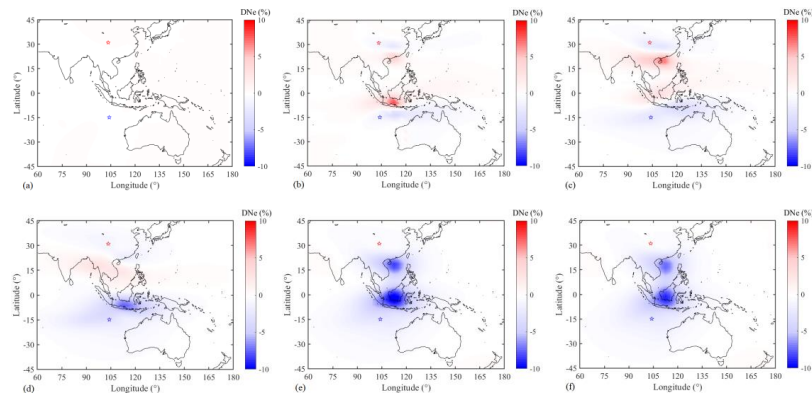

528

529

530

531

532

533

534

535

536

537

538

539

540

541

542

543

544

545

546

547

548

549

550

**Figure 6.** Ionospheric influence of the Wenchuan source at  $f = 1$  Hz on electron density Ne at different layers defined by the TIE-GCM model. The Wenchuan epicenter and its magnetically conjugated point have been labeled by a red star and a blue star, respectively in each panel. (a) layer 10 (~100 km in altitude), (b) 30 (~200 km), (c) 35 (~250 km), (d) 40 (~300 km), (e) 50 (~400 km) and (f) 55 (~450 km).

Figure 7 exhibits ionospheric influence with percentages of the additional potential on the electron density (Ne) at an altitude ~400 km (Figure 5a) and the total electron content (TEC) (Figure 5b). From Figure 7, it is clear that the additional potential from the Wenchuan source can cause negative variations on both parameters in the Wenchuan epicentral area, as well as in its magnetically conjugated area. The varied percentage could be up to 15%, and **this value is also consistent with the real-time measured magnitude.**

539

540

541

542

543

544

545

546

547

548

549

550

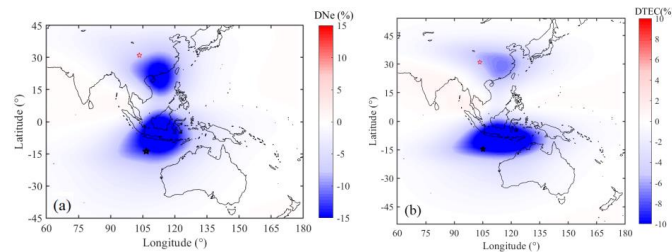

**Figure 7.** Ionospheric influence of the Wenchuan source at  $f = 10$  Hz on (a) electron density Ne at the high altitude 400 km and (b) the total electron content TEC. The Wenchuan epicenter and its magnetically conjugated point

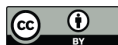

551 have been labeled by a red star and a blue star, respectively in each panel.

552

553       Apparently, variations of ionospheric parameters seem to be approximately proportional to the  
554 magnitude of the additional potential input. The varied magnitude on both parameters of electron  
555 density and the total electron content is covering 0.01–15% corresponding to the observing frequency  
556 band of  $f = 0.01\text{--}10$  Hz during the Wenchuan event. While this potential magnitude has been  
557 determined by the frequency of the signals observed during the earthquakes. Concerned with  
558 electromagnetic signals originated from seismic activities, on one hand, ULF signals can propagate to  
559 the ground surface due to their lower attenuation beneath the Earth. Li et al., (2013) have reported  
560  $\sim 0.1\text{--}0.3$  s electrical signals recorded during the climax stage of the anomaly before the Wenchuan  
561 main event. On the other hand, most experimental and real-time recordings have demonstrated that  
562 signals with relatively higher frequencies appear during the main rupture of strong seismic events,  
563 where the main rupture refers to a process of micro-cracks quickly developing into macro-rupture for  
564 pressed fault (Li et al., 2013; Qian et al., 1996, 2003; Hao et al., 2003). Please note, this rupture  
565 probably happens from the hypocentral depth till to the near Earth's surface during this period instead  
566 of only focusing on the small area around the hypocenter of an impending earthquake. Therefore, even  
567 signals with higher frequency than the ULF band can also easily propagate out of the Earth. Li et al.  
568 (2013) have also noticed that the climax occurred on May 9, 2008, three days prior to the Wenchuan  
569 main event, which indicates that an integrated effect of the electrical signals with different frequencies  
570 acts as persisting current equivalent to a direct current to cause a LAI coupling.

571       A direct current electrical penetration model has been utilized here to simulate and interpret the  
572 processing of the electrical current propagating in the atmosphere and ionosphere and simultaneously  
573 causing ionospheric influence. It is noticed from the simulation results that the patterns of the  
574 ionospheric variations are similar to what have been depicted in different literatures (Zhao et al., 2010;  
575 Pulinetes et al., 2010; Ryu et al., 2014; *and references therein*): the anomalies appear in bothside  
576 hemispheres with a shift to the equator. Also, previous researches have shown that the location of  
577 ionospheric effect is not coincident right with the vertical projection of the epicenter of the appending  
578 earthquake but shifts equatorward at high and middle latitudes. Li et al., (2023) have reported statistical  
579 seismo-ionospheric influence performed by electron density measured by the CSES (China Seismo-  
580 Electromagnetic Satellite) for more than three years shifts 500–700 km away instead of right above the  
581 epicenters for strong seismic activities in mid-low latitudes. Liu et al. (2009) have presented that the  
582 eastward plasma  $E \times B$  drift causes the GPS TEC enhancement slightly shifting to the east side of the  
583 Wenchuan epicenter, although the generated mechanism is not understood. The enhanced GPS TEC  
584 appeared in the southern China with a rounded shape, which is usually under control of the northern  
585 equatorial ionization anomaly (EIA). So, bothside ionospheric anomalies generally shift toward the  
586 equatorial area due to double crests of the EIA (Pulinetes & Boyarchuk, 2004; Liu et al., 2009; Zhao  
587 et al., 2008).

588       The ionospheric effect over the seismic activity areas in one hemisphere, as well as over their  
589 magnetical conjugation areas in the opposite hemisphere could be depicted along the geomagnetic field  
590 lines (Pulinetes & Boyarchuk 2004). It is possible the space distribution of the TEC influence has been  
591 determined by the joint effect of the two factors: the heating on the ionospheric properties by electric  
592 current and the plasma drift in the electric field caused also by this current. The resulting  $E \times B$  drift  
593 should lead to a redistribution of plasmatic parameters over the earthquake preparation zone, as well as  
594 over its magnetically conjugated area. The ionospheric anomalies in both sides of the sphere locate on



595 different sides of the magnetic meridian, which passes through the earthquake epicenter and its  
596 magnetic conjugate point (Ruzhin, et al., 2014). However, the central points of the ionospheric  
597 abnormalities on both hemispheres in this time seem to locate the same side of the magnetic meridian  
598 (see Figures 5–7). Also, noticed that, the spatial distribution and patterns of ionospheric variations  
599 could change with the shape and direction of the underground source during the calculation. However,  
600 we cannot determine the right shape of the real source causing by an earthquake. Another point is, the  
601 atmosphere, as a common part of the half-space model and the electrical penetration model utilized in  
602 this time, is of different properties: homogeneous medium with a specified conductivity in the first  
603 model and inhomogeneous medium with various parallel conductivity  $\sigma_{\parallel}$ , Pedersen conductivity  $\sigma_P$   
604 and Hall conductivity  $\sigma_H$  along the altitude in the second one, which could affect the final results. A  
605 comprehensive model with more precise lithospheric and atmospheric conductivity information will be  
606 expected to gain more reasonable results in the future.

## 607 608 **6. Conclusions**

609 This investigation aims to tentatively establish an LAI electromagnetic coupling process model in  
610 the light of several physical models and real-time recordings of different spheres before the Wenchuan  
611  $M_S8.0$  earthquake. A finite length electrical dipole in a half space model has been firstly employed to  
612 estimate the possible magnitude of the “energy source” for an observable  $1.3 \text{ mV m}^{-1}$  electrical field at  
613 1440 km Gaobeidian station. The results show that the expected seismo-telluric current falls in the  
614 range of  $I = 1.5 \times 10^5 - 3.4 \times 10^6 \text{ kA}$  if the observing ULF band of  $f = 0.01 - 10 \text{ Hz}$  has been considered.  
615 The electrical fields induced by this seismo-telluric current propagate from the Wenhuan hypocentral  
616 area to the ground and the magnitudes of their vertical components are beyond  $\text{kV m}^{-1}$  at the Earth’s  
617 surface, which will act as the input of the “energy source” arousing a coupling between the atmosphere  
618 and the ionosphere.

619 Then, the electric field penetration model developed by Zhou et al., (2017) has been utilized here  
620 to simulate the propagating process of the electrical field from the ground on one hand, and get the  
621 additional electrical field at the bottom of the ionosphere at 90 km, on the other hand. It has been  
622 testified that the magnitude of the additional electrical field at the bottom of the ionosphere ranges from  
623  $0.1 \text{ mV m}^{-1}$  to  $1000 \text{ mV m}^{-1}$  if the observing frequency considered and then this field is subjected to a  
624 severe decay in the well conductive ionosphere.

625 Finally, the magnitude of ionospheric variations induced by the additional field at the ionospheric  
626 bottom has been simulated by the TIE-GCM and the expected results can be up to 15% if combined  
627 effect of all recorded signals considered, which basically keeps the same magnitude as real-time  
628 ionospheric measurements. However, much work, such as, selections of parameters, construction of a  
629 comprehensive theoretical physical model, and so on, will be improved in the near future.

630

631

## 632 **Competing interests**

633 The contact author has declared that none of the authors has any competing interests.

634

635

## 636 **Acknowledgments**

637 This work was supported by the National Natural Science Foundation of China (NSFC) under Grant No. 41774084.

638 National Center for Atmospheric Research (NCAR) is supported by the National Science Foundation. The



639 TIEGCM model can be downloaded at <http://www.hao.ucar.edu/modeling/tgcm/download.php>.

640

#### 641 **Data Availability Statement**

642 All data and code utilized in this manuscript can be downloaded at <https://www.alipan.com/s/PRsZpAyoh3p>.

643

644

#### 645 **References**

646 Akhoondzadeh, M., Parrot, M., & Saradjian, M. R. (2010). Electron and ion density variations before strong  
647 earthquakes ( $M > 6.0$ ) using DEMETER and GPS data. *Nat. Hazards Earth Syst. Sci.*, *10*(1), 7–18.

648 <https://doi.org/10.5194/nhess-10-7-2010>

649 An, Z., Du, X., Tan, D., Fan, Y., Liu, J., & Cui, T. (2013). Study on the geo-electrical field variation of Sichuan  
650 Lushan  $M_S$  7.0 and Wenchuan  $M_S$  8.0 earthquake. *Chinese J. Geophys.*, *56*, 3868–3876 (in Chinese with  
651 English abstract).

652 Bock, Y. (1994). Crustal deformation and earthquakes. *Geotimes*, *39*(6), 16–18.

653 Bortnik, J., Bleier, T. E., Dunson, C., & Freund, F. (2010). Estimating the seismotelluric current required for  
654 observable electromagnetic ground signals, *Ann. Geophys.*, *28*, 1615–1624.

655 Cheng, F., Ren, Y., & Wu, X. (2010). Analyzing the anomalies of geo-electrical and geo-magnetic observation  
656 data in Sichuan Province before the 2008 Wenchuan  $M$  8.0 Earthquake. *Earthq. Res. Sichuan*, *135*, 2–9  
657 (in Chinese with English abstract).

658 Conti, L., Picozza, P., & Sotgiu, A. (2021). A critical review of ground based observations of earthquake  
659 precursors. *Front. Earth Sci.*, *9*, 676–766. <https://doi.org/10.3389/feart.2021.676766>

660 De Santis, A., Franceschi, G. D., Spogli, L., Perrone, L., Alfonsi, L., Qamili, E., Cianchini, G., Giovambattista, R.  
661 D., Salvi, S., Filippi, E., Pavon-Carrasco, F. J., Monna, S., Piscini, A., Battiston, R., Vitale, V., Picozza, P. G.,  
662 Conti, L., Parrot, M., Pincon, J. L., Balasis, G., Tavani, M., Argan, A., Piano, G., Rainone, M. L., Liu, W., &  
663 Tao, D. (2015). Geospace perturbations induced by the Earth: The state of the art and future trends. *Physics and  
664 Chemistry of the Earth*, *85–86*, 17–33. <https://doi.org/10.1016/j.pce.2015.05.004>

665 Eftaxias, K., Kapiris, P., Polygiannakis, J., Peratzakis, A., Kopanas, J., Antonopoulos, G., & Rigas, D. (2003).  
666 Experience of short term earthquake precursors with VLF-VHF electromagnetic emissions. *Nat. Hazards Earth  
667 Syst. Sci.*, *3*, 217–228. <https://doi.org/10.5194/nhess-3-217-2003>, 2003

668 Freund, F., & Wengeler, H. (1982). The infrared spectrum of OH-compensated defect sites in C-doped MgO and  
669 CaO single crystals. *J. Phys. Chem. Solids*, *43*, 129–145. [https://doi.org/10.1016/0038-1098\(82\)90739-6](https://doi.org/10.1016/0038-1098(82)90739-6)

670 Freund, F. (2002). Charge generation and propagation in igneous rocks. *J. Geodynamics*, *33*, 543–  
671 570. [https://doi.org/10.1016/S0264-3707\(02\)00015-7](https://doi.org/10.1016/S0264-3707(02)00015-7)

672 Freund, F. (2009). Stress-activated positive hole charge carriers in rocks and the generation of pre-earthquake  
673 signals, in: *Electromagnetic Phenomena Associated with Earthquakes*, edited by: Hayakawa, M., *Transworld  
674 Research Network, Trivandrum, India*, *3*, 41–96.

675 Freund, F. (2010). Toward a unified solid state theory for pre-earthquake signals. *Acta Geophys.*, *58*, 719–766.  
676 <https://doi.org/10.2478/s11600-009-0066-x>

677 Freund, F., & Sornette, D. (2007). Electro-magnetic earthquake bursts and critical rupture of peroxy bond  
678 networks in rocks. *Tectonophysics*, *431*, 33–47. <https://doi.org/10.1016/j.tecto.2006.05.032>

679 Freund, F. (2011). Pre-earthquake signals: Underlying physical processes. *J. Asian Earth Sci.*, *41*(4–5), 383–400.  
680 <https://doi.org/10.1016/j.jseas.2010.03.009>

681 Gao, S., Tang, J., Du, X., Liu, X., Su, Y., Chen, Y., Di, G., Mei, D., Zhan, Y., & Wang, L. (2010). The change  
682 characteristics of electromagnetic field before to after Wenchuan  $M_S$  8.0 earthquake. *Chinese J. Geophys.*, *53*,





- 683 512–525 (in Chinese with English abstract).
- 684 Gokhberg, M. B., & Shalimov, L. S. (2000). Lithosphere-ionosphere coupling and their modelling. *Russian J.*  
685 *Terrestrial Sciences*, 2(2), 95–108.
- 686 Hao, J., Qian, S., Zhou, J., & Zhu, T. (2003). ULF electric and magnetic anomalies accompanying the cracking of  
687 rock sample. *Acta Seismol. Sin.*, 25, 102–111 (in Chinese with English abstract).
- 688 Hayakawa, M., & Pulinets, S. (2010). Lithosphere-atmosphere-ionosphere coupling (laic) model. In  
689 Electromagnetic Phenomena Associated with Earthquakes. *Transworld Research Network: Trivandrum, India.*  
690 <https://doi.org/10.1016/j.jseaes.2010.03.005>
- 691 Hayakawa, M., Schekotov, A., Potirakis, S., Eftaxias, K., Li, Q., & Asano, T. (2015). An integrated study of ULF  
692 magnetic field variations in association with the 2008 Sichuan earthquake, on the basis of statistical and critical  
693 analyses. *Open J. Earthq. Res.*, 4, 85–93. <https://doi.org/10.4236/ojer.2015.43008>
- 694 He, Y., Yang, D., Qian, J., & Parrot, M. (2011). Response of the ionospheric electron density to different types of  
695 seismic events. *Nat. Hazards Earth Syst. Sci.*, 11, 2173–2180. <https://doi.org/10.5194/nhess-11-2173-2011>
- 696 Heavlin, W. D., Kappler, K., Yang, L., Fan, M., Hickey, J., Lemon, J., MacLean, L., Bleier, T., Riley, P., &  
697 Schneider, D. (2022). Case-control study on a decade of ground-based magnetometers in California reveals  
698 modest signal 24–72 hr prior to earthquakes. *J. Geophys. Res. Solid Earth*, 127, e2022JB024109.
- 699 He, L., & Heki, K. (2016). Threedimensional distribution of ionospheric anomalies prior to three large earthquakes  
700 in Chile. *Geophys. Res. Lett.*, 43, 7287–7293. <https://doi.org/10.1002/2016GL069863>
- 701 He, L., & Heki, K. (2018). Three-dimensional tomography of ionospheric anomalies immediately before the 2015  
702 Illapel earthquake, Central Chile. *J. Geophys. Res. Space Physics*, 123. <https://doi.org/10.1029/2017JA024871>
- 703 Hough, S. (2020). The great quake debate: the crusader, the skeptic, and the rise of modern seismology. *Hough:*  
704 *University of Washington Press.*
- 705 Hsiao, C. C., Liu, J. Y., Oyama, K. I., Yen, N. L., Liou, Y. A., Chen, S. S., & Miao, J. J. (2010).  
706 Seismo-ionospheric precursor of the 2008  $M_w7.9$  wenchuan earthquake observed by formosat-3/cosmic. *GPS*  
707 *Solut.*, 14, 83–89. <https://doi.org/10.1007/s10291-009-0129-0>
- 708 Huang, Q. (2011). Rethinking earthquake-related DC-ULF electromagnetic phenomena: Towards a physics-based  
709 approach. *Nat. Hazards Earth Syst. Sci.*, 11, 2941–2949. <https://doi.org/10.5194/nhess-11-2941-2011>
- 710 Huang, Q., & Lin, Y. (2010). Selectivity of seismic electric signal (SES) of the 2000 Izu earthquake swarm: a 3D  
711 FEM numerical simulation model. *Proc. Jpn. Acad., Ser.*, 86(3), 257–264. <https://doi.org/10.2183/pjab.86.257>
- 712 Hu, J., Liu, W., Guo, M., & Zheng, H. (2009). The “double low-points” anomaly of daily vertical component  
713 variation of geomagnetic field before the  $M$  8.0 Wenchuan earthquake. *Acta Seismol. Sin.*, 31, 589–593.  
714 (in Chinese with English abstract).
- 715 Jin, X., Zhang, L., Bu, J., Qiu, G., Ma, L., Liu, C., & Li, Y. (2020). Discussion on anomaly of atmospheric  
716 electrostatic field in wenchuan  $M_s8.0$  earthquake. *Journal of Electrostatics*, 104(1).
- 717 Key, K. (2009). 1-D inversion of multicomponent, multi-frequency marine CSEM data: Methodology and  
718 synthetic studies for resolving thin resistive layers. *Geophysics*, 74, 9–20, 2009.  
719 <https://doi.org/10.1190/1.3058434>
- 720 Kim, V. P., & Hegai, V. V. (1999). A possible presage of strong earthquakes in the night-time mid-latitude F2  
721 region ionosphere, in Atmospheric and Ionospheric Electromagnetic Phenomena Associated With Earthquakes,  
722 pp. 619–627, *Terra Sci., Tokyo.*
- 723 Kuo, C. L., Huba, J. D., Joyce, G., & Lee, L. C. (2011). Ionosphere plasma bubbles and density variations induced  
724 by pre-earthquake rock currents and associated surface charges. *J. Geophys. Res.*, 116, A10317.  
725 <https://doi.org/10.1029/2011ja016628>
- 726 Kuo, C. L., Lee L. C., & Huba, J. D. (2014). An improved coupling model for the



- 727 lithosphere-atmosphere-ionosphere system. *J. Geophys. Res. Space Physics*, 119(4), 3189–3205.  
728 <https://doi.org/10.1002/2013JA019392>
- 729 Li, M., Tan, H., Cao, M. (2016). Ionospheric influence on the seismo-telluric current related to electromagnetic  
730 signals observed before the Wenchuan  $M_S$  8.0 earthquake. *Solid Earth*, 7, 1405–1415.  
731 <https://doi.org/10.5194/se-7-1405-2016>
- 732 Li, M. & Lu, J. (2009) ULF electromagnetic abnormality recorded at Gaobeidian and Ningjin stations before  
733 Wenchuan 8.0 earthquake. *Int. Seismol. Dynam.*, 367, 76–82, 2009 (in Chinese with English abstract).
- 734 Li, M., Lu, J., Parrot, M., Tan, H., Chang, Y., Zhang, X., & Wang, Y. (2013). Review of unprecedented ULF  
735 electromagnetic anomalous emissions possibly related to the Wenchuan  $M_S = 8.0$  earthquake, on 12 May 2008.  
736 *Nat. Hazards Earth Syst. Sci.*, 13(2), 279–286. <https://doi.org/10.5194/nhess-13-279-2013>
- 737 Li, M., Lu, J., Zhang, X., & Shen, X. (2019). Indications of Ground-based Electromagnetic Observations to A  
738 Possible Lithosphere-Atmosphere-Ionosphere Electromagnetic Coupling before the 12 May 2008 Wenchuan  $M_S$   
739 8.0 Earthquake. *Atmosphere*, 10(7), 355. <https://doi.org/10.3390/atmos10070355>
- 740 Li, M., Jiang, X., Li, J., Zhang, Y., & Shen, X. (2023). Temporal-spatial characteristics of seismo-ionospheric  
741 influence observed by the CSES satellite. *Advances in Space Research*.  
742 <https://doi.org/10.1016/j.asr.2023.07.044>
- 743 Liperovsky, V. A., Pokhotelov, O. A., Meister, C.-V., & Liperovskaya, E.V. (2007). Physical models of coupling  
744 in the lithosphere-atmosphere-ionosphere system before earthquakes. *Geomagnetism & Aeronomy*, 48 (48),  
745 795–806. <https://doi.org/10.1134/S0016793208060133>
- 746 Li, Q., Schekotov, A., Asano, T., & Hayakawa, M. (2015). On the anomalies in ULF magnetic field variations  
747 prior to the 2008 Sichuan earthquake. *Open J. Earthq. Res.*, 4, 55–64. <https://doi.org/10.4236/ojer.2015.42005>
- 748 Liu, J.Y., Chen, Y.I., Chen, C.H., Liu, C.Y., Chen, C.Y., Nishihashi, M., Li, J. Z., Xia, Y.Q., Oyama, K. I., Hattori,  
749 K. (2009). Seismoionospheric GPS total electron content anomalies observed before the 12 May 2008  $M_W$ 7.9  
750 Wenchuan earthquake. *J. Geophys. Res.*, 114, A04320. <https://doi.org/10.1029/2008JA013698>
- 751 Liu, J. Y., Chen, Y. I., Huang, C. C., Parrot, M., Shen, X. H., Pulinet, S. A., Yang, Q. S., & Ho, Y.Y. (2015). A  
752 spatial analysis on seismo-ionospheric anomalies observed by DEMETER during the 2008  $M$  8.0 Wenchuan  
753 earthquake. *J. Asian Earth Sci.*, 114, S1367912015003399. <https://doi.org/10.1016/j.jseae.2015.06.012>
- 754 Ma, X., Lin, Z., Chen, H., Jin, H., Liu, X., & Jiao, L. (2014). Analysis on ionospheric perturbation of TEC and  
755 NmF2 based on GPS and COSMIC data before and after the Wenchuan earthquake. *Chin. J. Geophys.*, 57,  
756 2415–2422 (in Chinese with English abstract).
- 757 Maurya, A. K., Singh, R., Veenadhari, B., Kumar, S., & Singh, A. K. (2013). Sub-ionospheric very low frequency  
758 perturbations associated with the 12 May 2008  $M = 7.9$  Wenchuan earthquake. *Nat. Hazards Earth Syst. Sci.*, 13,  
759 2331–2336. <https://doi.org/10.5194/nhess-13-2331-2013>
- 760 Meister, C. V., Mayer, B., Dziendzie, P., Fulbert, F., Hoffmann, D. H. H., & Liperovsky, V. A. (2011). On the  
761 acoustic model of lithosphere-atmosphere-ionosphere coupling before earthquakes. *Nat. Hazards Earth Syst.*  
762 *Sci.*, 11(4), 1011–1017. <https://doi.org/10.5194/nhess-11-1011-2011>
- 763 Molchanov, O. A., Fedorov, E., Schekotov, A., Gordeev, E., Chebrov, V., Surkov, V., Rozhnoi, A., Andreevsky,  
764 S., Iudin, D., Yunga, S., Lutikov, A., Hayakawa, M., & Biagi, P. F. (2004).  
765 Lithosphere-atmosphere-ionosphere coupling as governing mechanism for preseismic short-term events in  
766 atmosphere and ionosphere. *Nat. Hazards Earth Syst. Sci.*, 4 (5–6), 757–767.  
767 <https://doi.org/10.5194/nhess-4-757-2004>
- 768 Namgaladze, A. A., Zolotov, O. V., Karpov, M. I., & Romanovskaya, Y. V. (2012). Manifestations of the  
769 earthquake preparations in the ionosphere total electron content variations. *Natural Science*, 4(11), 848–855.  
770 <https://doi.org/10.4236/ns.2012.411113>



- 771 Onishi, T., Berthelier, J. J., & Kamogawa, M. (2011). Critical analysis of the electrostatic turbulence  
772 enhancements observed by DEMETER over the Sichuan region during the earthquake preparation. *Nat. Hazards*  
773 *Earth Syst. Sci.*, *11*, 561–570. <https://doi.org/10.5194/nhess-11-561-2011>
- 774 Prescott, H. (2019). Pre-earthquake processes: a multidisciplinary approach to earthquake prediction  
775 studies. *International Geology Review*, *61*(16), 2080–2082. <https://doi.org/10.1080/00206814.2019.1579001>
- 776 Pulinets, S. A., & Davidenko, D. (2014). Ionospheric precursors of earthquakes and Global Electric Circuit. *Adv.*  
777 *Space Res.*, *53*(5): 709–723. <https://doi.org/10.1016/j.asr.2013.12.035>
- 778 Pulinets, S. A., & Boyarchuk, K. A. (2004). Ionospheric Precursors of Earthquakes. *Springer: Berlin/Heidelberg,*  
779 *Germany.*
- 780 Pulinets, S. A., & Ouzounov, D. (2010). Lithosphere-Atmosphere-Ionosphere Coupling (LAIC) model-An unified  
781 concept for earthquake precursors validation. *J. Southeast Asian Earth Sci.*, *41*(4–5), 371–382.  
782 <https://doi.org/10.1016/j.jseaes.2010.03.005>
- 783 Pulinets, S. A., Boyarchuk, K. A., Hegai, V. V., Kim, V. P., & Lomonosov, A. M. (2000). Quasielectrostatic model  
784 of atmosphere-thermosphere-ionosphere coupling. *Adv. Space Res.*, *26*(8): 1209–1218.  
785 [https://doi.org/10.1016/S0273-1177\(99\)01223-5](https://doi.org/10.1016/S0273-1177(99)01223-5)
- 786 Pulinets, S. A., Boyarchuk, K. A., Hegai, V. V., Kim, V. P., & Lomonosov, A. M. (2000). Quasielectrostatic  
787 model of atmosphere-thermosphere ionosphere coupling. *Adv. Space Res.*, *26*(8), 1209–1218.  
788 [https://doi.org/10.1016/S0273-1177\(99\)01223-5](https://doi.org/10.1016/S0273-1177(99)01223-5)
- 789 Pulinets, S.A., Bondur, V.G., Tsidilina, M.N., & Gaponova, M.V. (2009). Verification of the concept of  
790 seismoionospheric coupling under quiet heliogeomagnetic conditions, using the Wenchuan (China) earthquake  
791 of 12 May 2008, as an example. *Geomagn. Aeron.*, *50*, 231–242. <https://doi.org/10.1134/S0016793210020118>
- 792 Qian, S., Hao, J., Zhou, J., & Gao, J. (2003). Precursory Electric and Magnetic Signals at ULF and LF Bands  
793 during the Fracture of Rocks under Pressure. *Earthquake Research in China*, *19*, 109–116 (in Chinese with  
794 English abstract).
- 795 Qian, S., Ren, K., & Lü Z. (1996). Experimental study on VLF, MF, HF and VHF electromagnetic radiation  
796 characteristics with the rock breaking. *Earthquake Science*, *18*, 346–351 (in Chinese with English abstract).
- 797 Ren, H., Chen, X., & Huang, Q. (2012). Numerical simulation of coseismic electromagnetic fields associated with  
798 seismic waves due to finite faulting in porous media. *Geophys. J. Int.*, *188*(3), 925–944.  
799 <https://doi.org/10.1111/j.1365-246X.2011.05309.x>
- 800 Sorokin, V. M., & Hayakawa, M. (2013). Generation of Seismic-Related DC Electric Fields and  
801 Lithosphere-Atmosphere-Ionosphere Coupling. *Mod. Appl. Sci.*, *7*(6), 1–25.
- 802 Richmond, A. D., Ridley, E. C., & Roble G. A. (1992). A thermosphere/ionosphere general circulation model with  
803 coupled electrodynamics. *Geophys. Res. Lett.*, *19*(6), 601–604
- 804 Roble, R. G., Ridley, E. C., Richmond, A. D., & Dickinson, R. E. (1988). A coupled thermosphere general  
805 circulation model. *Geophysical Research Letters*, *15*(12). <https://doi.org/10.1029/GL015i012p01325>
- 806 Rougier, J., Guillas, S., Maute, A., & Richmond, A. D. (2007). Emulating the Thermosphere-Ionosphere  
807 Electrodynamics General Circulation Model (TIE-GCM). *Geoscientific model development*.  
808 <https://doi.org/10.5194/gmd-2-59-2009>
- 809 Ruzhin, Y. Y., Sorokin, V. M., & Yashchenko, A. K. (2014). Physical Mechanism of Ionospheric Total Electron  
810 Content Perturbations over a Seismoactive Region. *Geomagnetism and Aeronomy*, *54*(3), 337–346.  
811 <https://doi.org/10.1134/S001679321403013X>
- 812 Ryu, K., Parrot, M., Kim, S. G., Jeong, K. S., Chae, J. S., Pulinets, S., & Oyama, K. I. (2014). Suspected  
813 seismo-ionospheric coupling observed by satellite measurements and GPS TEC related to the M7.9 Wenchuan  
814 earthquake of 12 May 2008. *J. Geophys. Res. Space Phys.*, *119*, 305–323. <https://doi.org/10.1071/ZO9930037>



- 815 <https://doi.org/10.5194/angeo-28-1615-2010>
- 816 Scoville, J., Sornette, J., & Freund, F. (2015). Paradox of peroxy defects and positive holes in rocks Part II:  
817 Outflow of electric currents from stressed rocks. *J. Asian Earth Sci.*, *114*, 338–351.  
818 <https://doi.org/10.1016/j.jseaes.2015.04.016>
- 819 Sorokin, V. M., & Hayakawa, M. (2014). Plasma and electromagnetic effects caused by the seismic-related  
820 disturbances of electric current in the global circuit. *Mod. Appl. Sci.*, *8*(4), 61–83.  
821 <https://doi.org/10.5539/mas.v8n4p61>
- 822 Sun, Y., Oyama, K.-I., Liu, J., Jhuang, H., & Cheng, C. (2011). The neutral temperature in the ionospheric dynamo  
823 region and the ionospheric F region density during Wenchuan and Pingtung Doublet earthquakes.  
824 *Nat. Hazards Earth Syst. Sci.*, *11*, 1759–1768. <https://doi.org/10.5194/nhess-11-1759-2011>
- 825 Walker, S. N., Kadirkamanathan, V., & Pokhotelov, O. A. (2013). Changes in the ultra-low frequency wave field  
826 during the precursor phase to the Sichuan earthquake: DEMETER observations. *Ann. Geophys.*, *31*, 1597–1603.  
827 <https://doi.org/10.5194/angeo-31-1597-2013>
- 828 Wang, W., Ding, J., Yu, S., & Zhang, Y. (2009). Short-term geomagnetic abnormality before Wenchuan M<sub>s</sub> 8.0  
829 earthquake and strong earthquake prediction explore. *Earthq. Sci.*, *31*, 172–179 (in Chinese with English  
830 abstract).
- 831 Yan, X., Shan, X., Cao, J., Tang, J., & Wang, F. (2012). Seismoionospheric anomalies observed before the  
832 Wenchuan earthquake using GPS and DEMETER data. *Seismol. Geol.*, *34*, 160–171 (in Chinese with English  
833 abstract). <https://doi.org/10.3969/j.issn.0253-4967.2012.01.015>
- 834 Yang, X., Zhou, C., Liu, J., Zhao, Y., & Zhang, Y. (2014). A numerical study of seismic-related electric field in  
835 the ionosphere. *Chinese J. Geophys.*, *57*(11), 3650–3658. <https://doi.org/10.6038/cjg20141119>
- 836 Yu, T., Mao, T., Wang, Y., & Wang, J. (2009). Study of the ionospheric anomaly before the Wenchuan earthquake.  
837 *Chin. Sci. Bull.*, *54*, 1086–1092 (in Chinese with English abstract).
- 838 Zeng, Z., Zhang, B., Fang, G., Wang, D., & Yin, H. (2009). The analysis of ionospheric variations before the  
839 Wenchuan earthquake with DEMETER data. *Chinese J. Geophys.*, *52*, 11–19 (in Chinese with English abstract).
- 840 Zhang, Y., Feng, W., Xu, L., Zhou, C., & Chen, Y. (2009a). Spatio-temporal rupture process of the 2008 great  
841 Wenchuan earthquake. *Science China Ser. D*, *52*, 145–154.
- 842 Zhang, X., Ding, J., Shen, X., Wang, M., & Ouyang, X. (2009b). Electromagnetic perturbations before wenchuan  
843 M<sub>8</sub> earthquake and stereo electromagnetic observation system. *Chinese Journal of Radio Science*, *24*(1), 1–8.  
844 [https://doi.org/10.1016/S1874-8651\(10\)60080-4](https://doi.org/10.1016/S1874-8651(10)60080-4)
- 845 Zhao, B., Yu, T., Wang, M., Wan, W., Lei, J., Liu, L., & Ning, B. (2008). Is an unusual large enhancement of  
846 ionospheric electron density linked with the 2008 great Wenchuan earthquake? *J. Geophys. Res.*, *113*, A11304.
- 847 Zhao, B., Wang, M., Yu, T., Xu, G., Wan, W., & Liu, L. (2010). Ionospheric total electron content variations prior  
848 to the 2008 Wenchuan Earthquake. *Int. J. Remote Sens.*, *31*, 3545–3557.  
849 <https://doi.org/10.1080/01431161003727622>
- 850 Zolotov, O. V., Namgaladze, A. A., Zakharenkova, I. E., Martynenko, O. V., & Shagimuratov, I. I. (2012).  
851 Physical Interpretation and Mathematical Simulation of Ionospheric Precursors of Earthquakes at Midlatitudes.  
852 *Geomagnetism & Aeronomy*, *52*(3), 390–397. <https://doi.org/10.1134/s0016793212030152>
- 853 Zolotov, O. V. (2015). Ionosphere Quasistatic Electric Fields Disturbances over Seismically Active Regions as  
854 Inferred from Satellite-Based Observations: A Review. *Russian Journal of Physical Chemistry B*, *9*(5), 785–  
855 788.
- 856 Zhou, C., Liu, Y., Zhao, S., Liu, J., Zhang, X., & Huang, J., Shen, X., Ni, B., & Zhao, Z. (2017). An electric field  
857 penetration model for seismo-ionospheric research. *Adv. Space Res.*, 2217–2232.  
858 <https://doi.org/10.1016/j.asr.2017.08.007>



859     Zhu, F., Wu, Y., Lin, J., Zhou, Y., Xiong, J., & Yang, J. (2009). Anomalous response of ionospheric VTEC before  
860     the Wenchuan earthquake. *Acta Seismol. Sin.*, 31, 180–187. [https://doi.org/10.1016/S1874-8651\(10\)60080-4](https://doi.org/10.1016/S1874-8651(10)60080-4)  
861
